# Supplementary material for: Predictability of individual circadian phase during daily routine for medical applications of circadian clocks
Source: PubMed Central journal article supplement (PMC6795290; doi:10.1172/jci.insight.130423), 2019-09-19
Supplement: jciinsight-4-130423-s183.pdf [file jciinsight-4-130423-s183.pdf]

**Table S1: Participants' main characteristics**

|                               | Number of subjects | %     |
|-------------------------------|--------------------|-------|
| <b>Sex</b>                    |                    |       |
| M                             | 15                 | 45.5% |
| F                             | 18                 | 54.5% |
| <b>Age</b>                    |                    |       |
| < 40 y.o.                     | 18                 | 54.5% |
| ≥ 40 y.o                      | 15                 | 45.5% |
| <b>BMI</b>                    |                    |       |
| Less than 18.5 - underweight  | 0                  | 0%    |
| 18.5 to 24.9 - healthy weight | 18                 | 54.5% |
| 25 to 29.9 - overweight       | 13                 | 39.4% |
| 30 to 39.9 - obese            | 1                  | 3.0%  |
| 40 and over - morbidly obese  | 1                  | 3.0%  |
| <b>Work Status</b>            |                    |       |
| Student                       | 11                 | 33.3% |
| Worker                        | 15                 | 45.5% |
| Retired                       | 7                  | 21.2% |
| <b>Lifestyle</b>              |                    |       |
| Sedentary                     | 12                 | 36.4% |
| Sporty                        | 4                  | 12.1% |
| Variable-Irregular            | 17                 | 51.5% |
| <b>Chronotype</b>             |                    |       |
| Definite morning              | 5                  | 15.2% |
| Moderate morning              | 10                 | 30.3% |
| Intermediate                  | 15                 | 45.5% |
| Moderate evening              | 3                  | 9.1%  |
| Definite evening              | 0                  | 0%    |
| <b>Medical condition</b>      |                    |       |
| None                          | 22                 | 66.7% |
| Past                          | 3                  | 9.1%  |

|                                     |    |       |
|-------------------------------------|----|-------|
| Ongoing                             | 8  | 24.2% |
| <b>Main medical conditions</b>      |    |       |
| Mild high blood pressure            | 3  | 9.1%  |
| Hypercholesterolemia                | 2  | 6.1%  |
| <b>Medication</b>                   |    |       |
| None                                | 25 | 75.8% |
| One                                 | 3  | 9.1%  |
| > Two                               | 5  | 15.1% |
| <b>Most frequent medications</b>    |    |       |
| Antihypertensive                    | 4  | 12.1% |
| Metabolic disorder therapy          | 3  | 9.1%  |
| <b>Contraceptive methods</b>        |    |       |
| None                                | 6  | 18.2% |
| Pill                                | 5  | 15.1% |
| Intrauterine device or system       | 3  | 9.1%  |
| Not applicable (menopausal females) | 4  | 12.1% |
| Not applicable (males)              | 15 | 45.5% |

**Figure S1: Multiple correlation matrix of phase indicators**

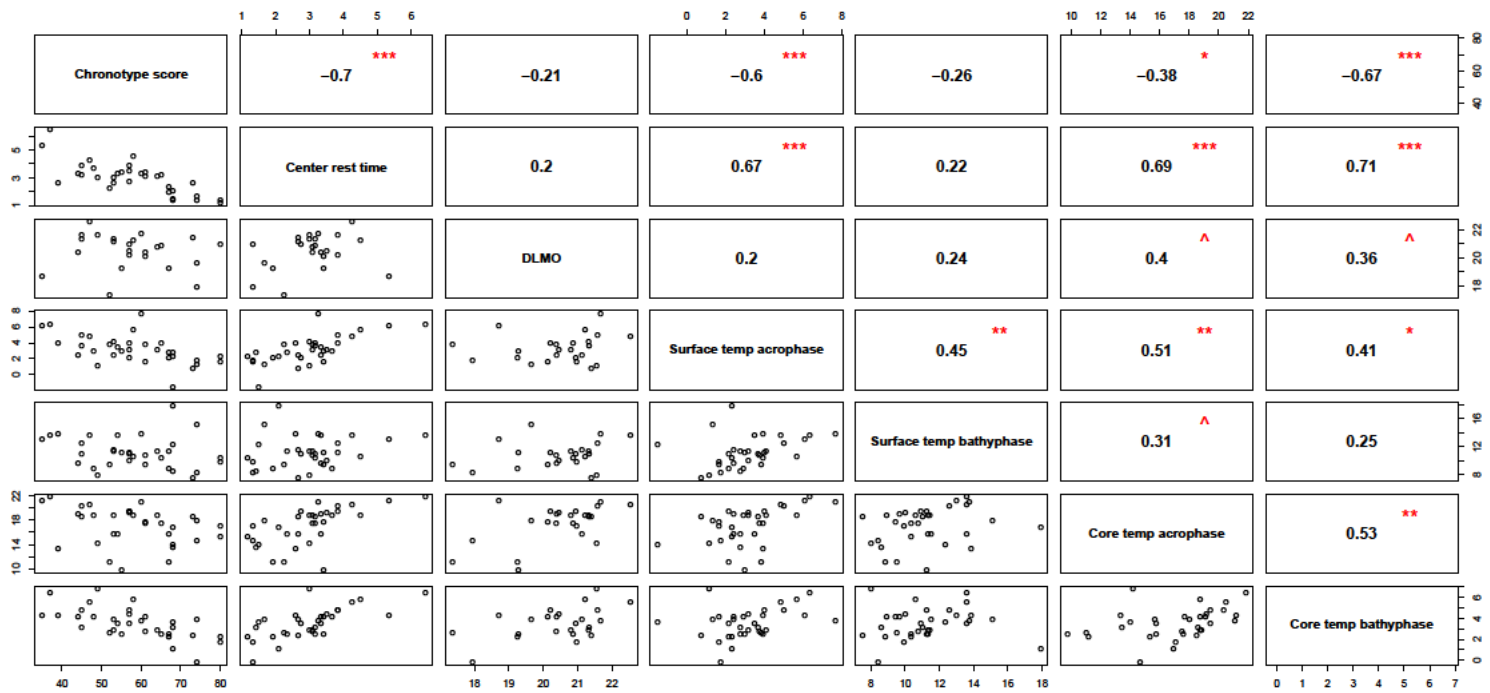

Spearman correlation coefficients with stars indicating p-value levels,

i.e. 0 '\*\*\*' 0-001 '\*\*' 0-01 '\*' 0-05 '^' 0-1.

*DLMO stands for Dim Light Melatonin Onset*

**Figure S2: Comparative distribution of circadian phase estimates in current study and independent data set.**

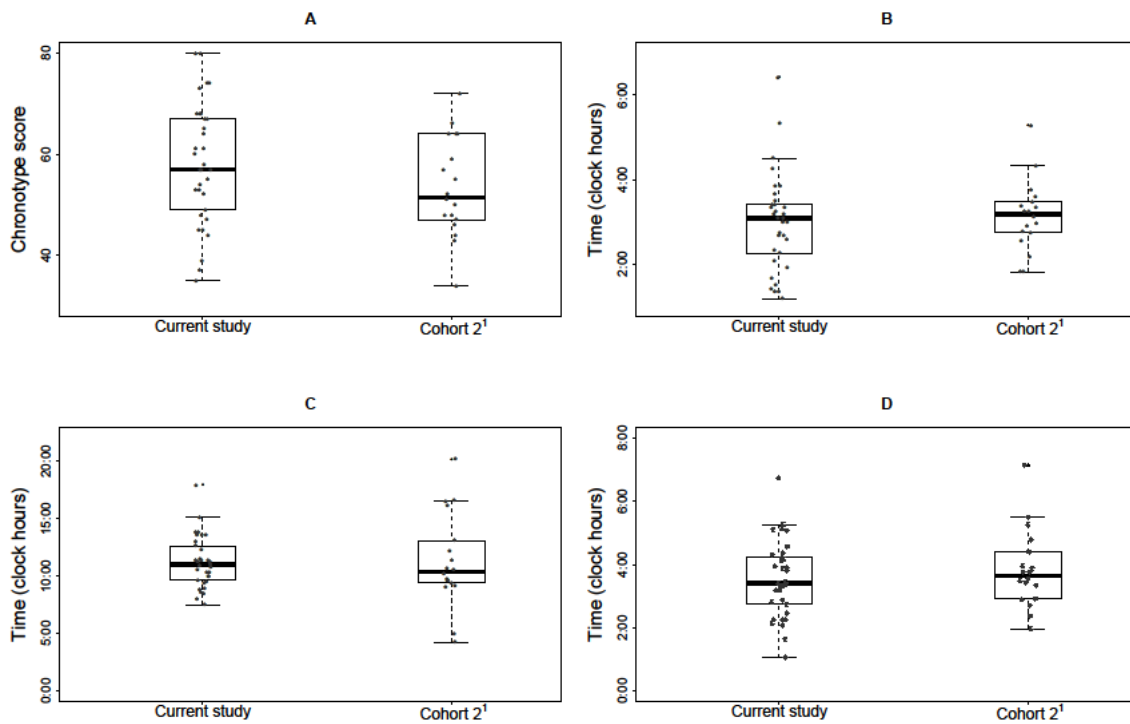

Panel A: Boxplots of chronotype scores for subjects in current study (left N=33) and cohort 2(1) (right N=18).

Panel B: Boxplots of center-of-rest times.

Panel C: Boxplots of chest surface temperature bathyphase.

Panel D: Boxplots of predicted core body temperature bathyphase using the INTime model.

## References

1. Komarzynski S, Huang Q, Innominato PF, Maurice M, Arbaud A, Beau J, et al. Relevance of a Mobile Internet Platform for Capturing Inter- and Intrasubject Variabilities in Circadian Coordination During Daily Routine: Pilot Study. *J Med Internet Res.* 2018;20(6):e204.
